# Supplementary material
Source: publisher figshare collection journal article supplement (https://acs.figshare.com/ndownloader/files/7674106)
Supplement: Supplementary file 1 [file 7674106]

Compound	Smiles	Fold Change in Caspase 3/7 relative to DMSO HEK Cells Run 1	Fold Change in Caspase 3/7 relative to DMSO HEK Cells Run 2	Fold Change in Caspase 3/7 relative to DMSO HEK Cells Run 3	Fold Change in Caspase 3/7 relative to DMSO Mouse Primary Hepatocytes Run 1	Fold Change in Caspase 3/7 relative to DMSO Mouse Primary Hepatocytes Run 2	Human Micorosmal Metabolism (%)	Mouse Micorosmal Metabolism (%)	Human CYP3A4 Inhibition (%)	Human CYP2D6 Inhibition (%)	Human CYP2C9 Inhibition (%)	Fold Increase in Glucose-Stimulated Insulin Secretion (GSIS) in Mouse Islets	Fold Increase in Glucose-Stimulated Insulin Secretion (GSIS) in Human Islets
1	CCCc1c(c(c(o1)CCC(=O)O)C(=O)O)C	0.8	1.1	0.9	0.8	0.7			0	0	0	0.691707983	0.508112
2	CCCCCc1c(c(c(o1)CCC(=O)O)C(=O)O)C	1	1	1	1.5	1.2	5	7	3	3	9	0.537047707	0.402483
3	CCC(=O)c1c(c(c(o1)CCC(=O)O)C(=O)O)C	1.1	1	1	1.1	1.1			3	11	10	0.954456947	0.454528
4	CCCCCC1(C(=C(C(O1)(CCC(=O)OC)O)C(=O)OC)C)O	1.1	1	1	0.9	0.9						1.376277629	0.567731
15	CCCCCc1c(c(c(o1)CCC(=O)OC)C(=O)OC)C	1	1.2	1.1	1.2	1	49	60	59	28	27	0.862277588	1.409135
16	Cc1c(oc(c1C(=O)OC)CCC(=O)OC)C	1	1.1	1.1	0.8	0.8	0	16	22	12	3	0.804776461	1.056714
17	CCc1c(oc(c1C(=O)OC)CCC(=O)OC)CC	0.9	1	0.9	1	0.9						0.659223492	0.838597
18	CCCc1c(oc(c1C(=O)OC)CCC(=O)OC)CCC	1	1.1	1.1	0.9	0.8						1.175597321	0.670631
19	COC(=O)CCc1c(c2c(o1)CCCC2)C(=O)OC	1.1	1	1.1	0.4	0.4	16	76	48	20	2	0.870139738	0.503653
20	Cc1c(oc(c1C(=O)OC)CCC(=O)OC)CCOCc2ccccc2
22	CCCc1c(c(c(o1)CCCO)C(=O)OC)C	1	1.1	1	0.6	0.6	100	100	0	0	0	1.498423717	1.7725
24	CCCc1c(oc(c1C(=O)O)CCC(=O)O)CCC	0.8	1	0.9	2	2	ND	ND	0	5	1	0.806397259	0.526659
25	Cc1c(oc(c1C(=O)O)CCC(=O)O)C	1	1	1	1.1	1.1	0	21	0	3	17	0.912962609	0.346289
26	CCc1c(oc(c1C(=O)O)CCC(=O)O)CC	1	1	1	1.8	1.6	3	7	0	0	0	0.782261222	0.68778
27	CCCc1c(c(c(o1)CCCO)C(=O)O)C	1	1	1	0.6	0.6	10	9	2	2	3	1.746795774	0.721643
28	Cc1c(oc(c1C(=O)O)CCC(=O)O)CCOCc2ccccc2	1.1	1.1		1.4
29	CCCc1c(c(c(o1)CCC)C(=O)O)C	1	2	1.5	1.4	1.4	21	51	13	5	18	0.852406952	0.461715
31	CCCc1c(c(c(o1)CCC(=O)C)C(=O)C)C	0.9	0.9	0.9	0.3	0.3			21	0	0	1.227412223	0.996472
32	CCCc1c(cc(o1)CCC(=O)O)C	1	0.9	0.9	0.7	0.7	0	20	3	0	9	1.062737175	0.807207
34	CCC(=O)c1c(c(c(o1)CCC(=O)OC)C(=O)OC)C	1	1.1		1.5
36	CCCc1c(c(c(o1)C(=O)O)C)C	1	1.2		2.2		20	0	0	0	0
41	CCC[C@H]1C[C@@H]([C@H](O1)CCC(=O)OC)C(=O)OC	1	1.1		1.3
42	CCC[C@H]1C[C@@H]([C@H](O1)CCC(=O)O)C(=O)O	1	1.2		2
43	CCCC1(C(=C(C(O1)(CCC(=O)OC)O)C(=O)OC)C)O	1	0.9	0.9	0.3	0.3						2.049858421	0.877785
46	CC[13CH2]c1c(c(c(o1)CCC(=O)O)C(=O)O)C
50	CCCc1c(c([13c](o1)CC[13C](=O)O)C(=O)O)C
54	CCCc1c([13c](c(o1)CCC(=O)O)[13C](=O)O)C
